# Supplementary material for: Impact of COVID-19 Pandemic on Initiation of Immunosuppressive Treatment in Immune-Mediated Inflammatory Diseases in Austria: A Nationwide Retrospective Study
Source: MDPI journal article supplement (doi:10.3390/jcm11185308), 2022-09-09
Supplement: s1 [file s1]

## Supplementary Material

## Article

# Impact of COVID-19 Pandemic on Initiation of Immunosuppressive Treatment in Immune-Mediated Inflammatory Diseases in Austria: A Nationwide Retrospective Study

Maximilian Kutschera <sup>1</sup>, Valentin Ritschl <sup>2,3,\*</sup>, Berthold Reichardt <sup>4</sup>, Tanja Stamm <sup>2,3,\*</sup>, Hans Kiener <sup>5</sup>, Harald Maier <sup>6</sup>, Walter Reinisch <sup>1</sup>, Bernhard Benka <sup>7</sup> and Gottfried Novacek <sup>1</sup>

- <sup>1</sup> Department of Internal Medicine III, Division of Gastroenterology and Hepatology, Medical University of Vienna, 1090 Vienna, Austria
  - <sup>2</sup> Institute of Outcomes Research, Center for Medical Statistics, Informatics and Intelligent Systems, Medical University of Vienna, 1090 Vienna, Austria
  - <sup>3</sup> Ludwig Boltzmann Institute for Arthritis and Rehabilitation, 1090 Vienna, Austria
  - <sup>4</sup> Austrian Health Insurance Fund, Eisenstadt, Austria
  - <sup>5</sup> Department of Internal Medicine III, Division of Rheumatology, Medical University of Vienna, 1090 Vienna, Austria
  - <sup>6</sup> Department of Dermatology, Medical University of Vienna, 1090 Vienna, Austria
  - <sup>7</sup> AGES—Austrian Agency for Health and Food Safety Ltd., Division of Public Health, 1220 Vienna, Austria
- \* Correspondence: [tanja.stamm@meduniwien.ac.at](mailto:tanja.stamm@meduniwien.ac.at); Tel.: +43-1-40400-16370

**Citation:** Kutschera, M.; Ritschl, V.; Reichardt, B.; Stamm, T.; Kiener, H.; Maier, H.; Reinisch, W.; Benka, B.; Novacek, G. Impact of COVID-19 Pandemic on Initiation of Immunosuppressive Treatment in Immune-Mediated Inflammatory Diseases in Austria: A Nationwide Retrospective Study. *J. Clin. Med.* **2022**, *11*, 5308. <https://doi.org/10.3390/jcm11185308>

Academic Editors: Francesco Pugliese, Francesco Alessandri and Giovanni Giordano

Received: 9 August 2022

Accepted: 3 September 2022

Published: 9 September 2022

**Publisher's Note:** MDPI stays neutral with regard to jurisdictional claims in published maps and institutional affiliations.

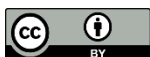

**Copyright:** © 2022 by the authors. Submitted for possible open access publication under the terms and conditions of the Creative Commons Attribution (CC BY) license (<https://creativecommons.org/licenses/by/4.0/>).

**Supplemental Table S1.** Diagnoses of immune-mediated inflammatory diseases in 56,913 out of 95,573 patients.

| <u>Diagnosis</u>                     | <u>n (%)</u>  |
|--------------------------------------|---------------|
| Inflammatory bowel disease           | 41,631 (43.5) |
| Crohn's disease                      | 3529 (3.7)    |
| Plaque Psoriasis/Psoriatic arthritis | 3091 (3.2)    |
| Ulcerative Colitis                   | 2,21 (3.0)    |
| Rheumatoid arthritis                 | 1995 (2.1)    |
| Atopic dermatitis                    | 1710 (1.8)    |
| Plaque Psoriasis                     | 1287 (1.4)    |
| Ankylosing spondylitis               | 259 (0.3)     |
| Hidradenitis suppurativa             | 179 (0.2)     |
| Childhood arthritis                  | 152 (0.2)     |

|                     |           |
|---------------------|-----------|
| Uveitis             | 112 (0.1) |
| Lupus erythematosus | 79 (0.1)  |
| Psoriatic arthritis | 35 (0.04) |
| Behçet-disease      | 33 (0.04) |

We assigned diagnoses based on medications which were only approved for one specific indication during the 20 observation period: Abatacept was only approved for rheumatoid arthritis, apremilast for plaque psoriasis and

psoriasis 21 arthritis (a differentiation between both indications was not possible), belimumab for lupus erythematoses, 22 brodalimumab for plaque psoriasis, dupilumab for atopic dermatitis, filgotinib for rheumatoid arthritis (approval for 23 ulcerative colitis occurred after the observation period), guselkumab for plaque psoriasis and psoriasis arthritis (a 24 differentiation was not possible), mesalazine for inflammatory bowel disease (a differentiation between Crohn's disease 25 and ulcerative colitis was not possible), risankizumab for plaque psoriasis, sarilumab for rheumatoid arthritis, 26 tildrakizumab for plaque psoriasis, and vedolizumab for inflammatory bowel disease (a differentiation between 27 Crohn's disease and ulcerative colitis was not possible). These additional diagnoses were added to the coded diagnoses 28 of hospitalizations (Table 1 of the manuscript). In another 38,860 patients the diagnosis was not available. .

Due to the frequent use of mesalazine (approved for inflammatory bowel diseases), IBD is overrepresented in the data set compared to other immune-mediated inflammatory diseases.

**Supplemental Table S2.** Starts of medications during the observation period 2017 to 2020 (n=122,213).

| <u>Medication</u> | <u>Absolute frequency</u> |
|-------------------|---------------------------|
| Abatacept         | 1265                      |
| Adalimumab        | 12,867                    |
| Anakinra          | 314                       |
| Azathioprine      | 7661                      |
| Baricitinib       | 1486                      |

|                    |        |
|--------------------|--------|
| Belimumab          | 170    |
| Brodalumab         | 197    |
| Canakinumab        | 16     |
| Certolizumab pegol | 1037   |
| Ciclosporin        | 2239   |
| Dupilumab          | 2056   |
| Etanercept         | 4631   |
| Golimumab          | 2838   |
| Infliximab         | 2234   |
| Ixekizumab         | 1835   |
| Leflunomid         | 4098   |
| Mesalazine         | 48,402 |
| Methotrexate       | 87     |
| Mycophenolacid     | 4920   |

|               |      |
|---------------|------|
| Risankizumab  | 410  |
| Rituximab     | 559  |
| Sarilumab     | 21   |
| Secukinumab   | 2321 |
| Sulfasalazine | 7415 |

|               |      |
|---------------|------|
| Tildrakizumab | 232  |
| Tocilizumab   | 3402 |
| Tofacitinib   | 1585 |
| Upadacitinib  | 472  |
| Ustekinumab   | 2486 |
| Vedolizumab   | 1416 |

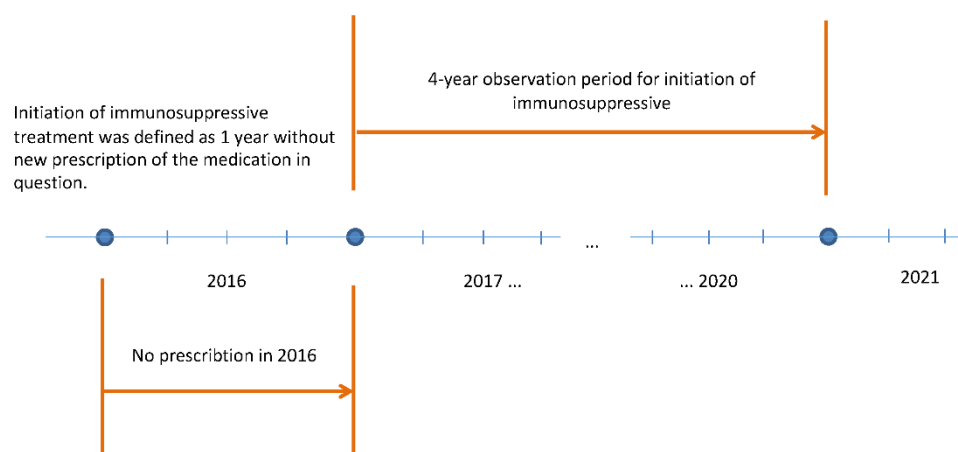

Supplemental Figure S1. Timeline of the study.

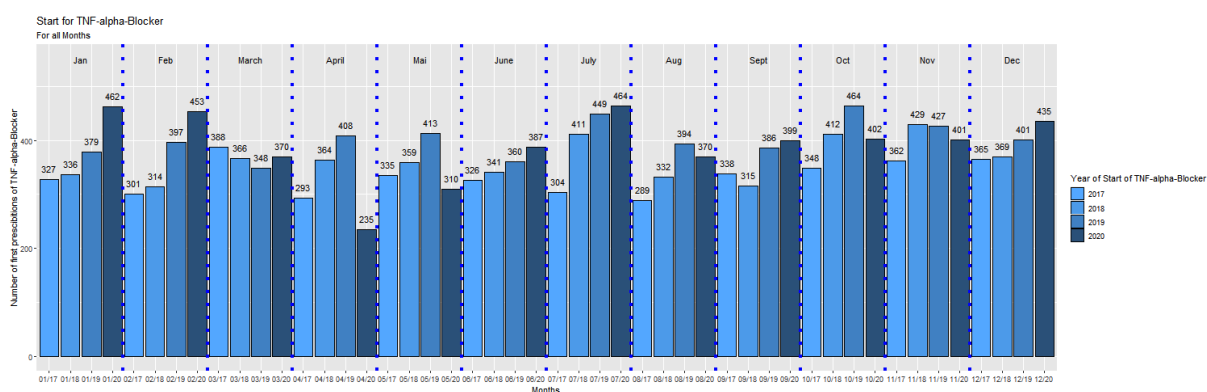Supplemental Figure S2. Start of TNF $\alpha$  inhibitors in the period 2017-2020

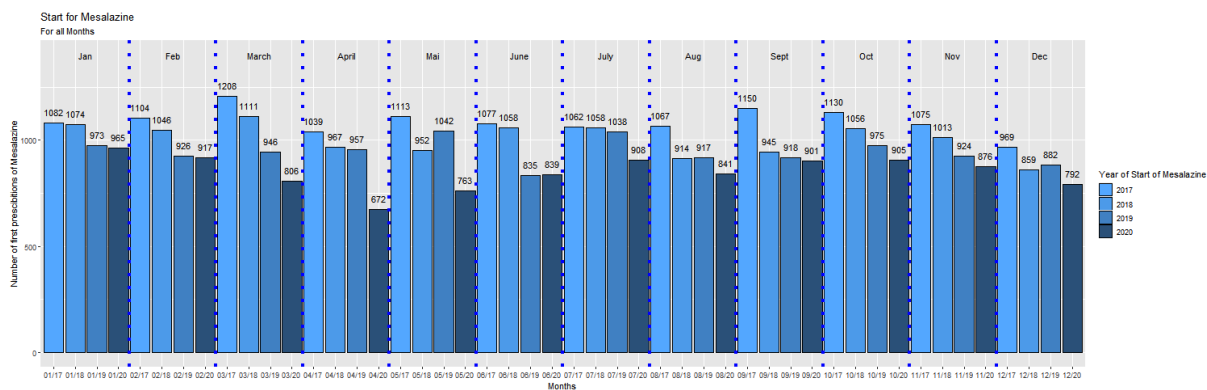

Supplemental Figure S3. Start of mesalazin (2017-2020).

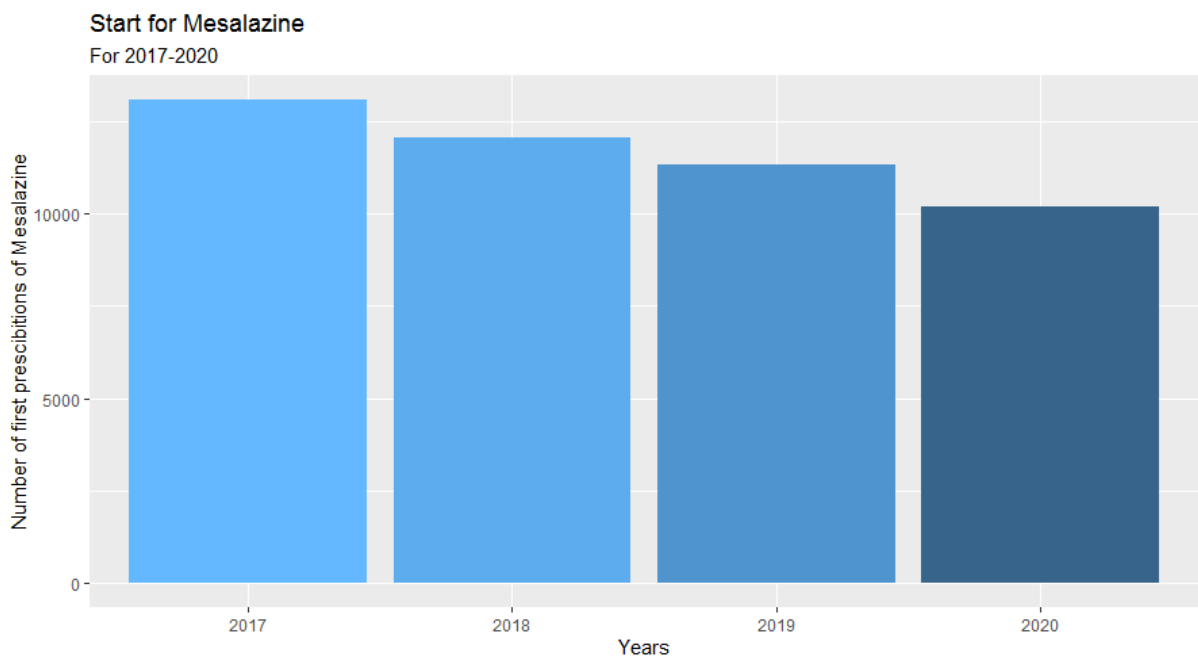

Supplemental Figure S4. Annual start of mesalazine from 2017 to 2020.
